# Supplementary material
Source: PubMed Central journal article supplement (PMC5937117)

# Study Procedures

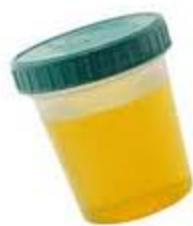

Urine pellet

DNA extracted using phenol:chloroform method that incorporates multiple enzyme digest and bead beating

Real time quantitative PCR (qPCR) for number of copies of 16S rDNA (bacterial load)

16S rDNA amplification with V6 primers  
Barcoded – 10 samples per sequencing lane

Illumina sequencing (HiSeq)  
(SKCCC Next Gen Sequencing Center at JHMI)

Bioinformatics  
(Resphera Biosciences)

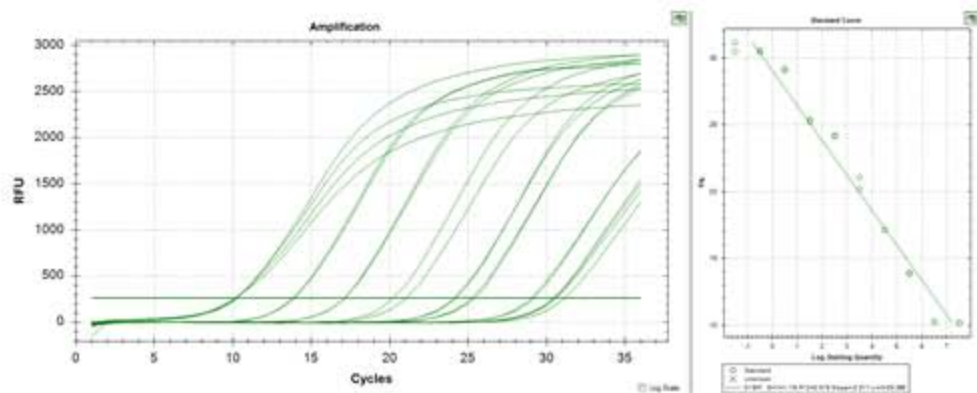

Supplement: NIHMS962908-supplement-Suppl_Fig_S1.pdf [file NIHMS962908-supplement-Suppl_Fig_S1.pdf]
