# Supplementary material
Source: PubMed Central journal article supplement (PMC5937117)
Supplement: NIHMS962908-supplement-Suppl_Table.pdf [file NIHMS962908-supplement-Suppl_Table.pdf]

Table 2. Select Differentially Abundant Species in Urine Pellet Samples

| Species/OTUs                                                     | Mean                    | No. Pos. (%)**      | Mean                     | No. Pos. (%)        | Std Errors            |                     | Negative Binomial Test (DESeq) |                         |                                       |                              |                                       |                            |                                 |
|------------------------------------------------------------------|-------------------------|---------------------|--------------------------|---------------------|-----------------------|---------------------|--------------------------------|-------------------------|---------------------------------------|------------------------------|---------------------------------------|----------------------------|---------------------------------|
| <b>More Abundant in Cancer</b>                                   | <b>Benign (n=63)</b>    |                     | <b>Cancer (n=61)</b>     |                     | <b>Benign</b>         | <b>Cancer</b>       | <b>P-value</b>                 | <b>FDR adj. P-value</b> |                                       |                              |                                       |                            |                                 |
| Propionimicrobium lymphophilum                                   | 0.00096                 | 8 (12.7%)           | 0.01437                  | 16 (26.2%)          | 0.00058               | 0.00935             | 0.00686                        | 0.02809                 |                                       |                              |                                       |                            |                                 |
| Anaerococcus murdochii                                           | 0                       | 0                   | 0.00526                  | 6 (9.8%)            | 0                     | 0.00472             | 0                              | 0                       |                                       |                              |                                       |                            |                                 |
| Auritidibacter ignavus/Corynebacterium coyleae                   | 0.00037                 | 8 (12.7%)           | 0.00373                  | 21 (34.4%)          | 0.00018               | 0.00143             | 0.00189                        | 0.00913                 |                                       |                              |                                       |                            |                                 |
| Ureaplasma urealyticum                                           | 0                       | 0                   | 0.00005                  | 1 (1.6%)            | 0                     | 0.00005             | 0.00059                        | 0.00310                 |                                       |                              |                                       |                            |                                 |
| Ureaplasma parvum:urealyticum                                    | 0                       | 0                   | 0.00004                  | 2 (3.3%)            | 0                     | 0.00004             | 0.00161                        | 0.00793                 |                                       |                              |                                       |                            |                                 |
| <b>More Abundant in Benign</b>                                   | <b>Benign (n=63)</b>    |                     | <b>Cancer (n=61)</b>     |                     | <b>Benign</b>         | <b>Cancer</b>       | <b>P-value</b>                 | <b>FDR adj. P-value</b> |                                       |                              |                                       |                            |                                 |
| unassigned Enterobacteriaceae                                    | 0.02233                 | 13 (20.6%)          | 0.00257                  | 13 (21.3%)          | 0.01202               | 0.00126             | 0.00574                        | 0.02379                 |                                       |                              |                                       |                            |                                 |
| Corynebacterium genitalium:jeikeium:riegelii                     | 0.01270                 | 19 (30.2%)          | 0.00144                  | 15 (24.6%)          | 0.00554               | 0.00064             | 0.00161                        | 0.00793                 |                                       |                              |                                       |                            |                                 |
| Haemophilus haemolyticus:parainfluenzaes                         | 0.00603                 | 4 (6.3%)            | 0                        | 0                   | 0.00601               | 0                   | 0                              | 0                       |                                       |                              |                                       |                            |                                 |
| <b>More Abundant in Higher Grade</b>                             | <b>Low grade (n=39)</b> |                     | <b>High grade (n=22)</b> |                     | <b>Low Grade</b>      | <b>High Grade</b>   | <b>P-value</b>                 | <b>FDR adj. P-value</b> |                                       |                              |                                       |                            |                                 |
| Unassigned Streptococcus                                         | 0.00652                 | 23 (59.0%)          | 0.05065                  | 15 (68.2%)          | 0.00313               | 0.03661             | 0.01190                        | 0.04398                 |                                       |                              |                                       |                            |                                 |
| Unassigned Streptococcus                                         | 0.00158                 | 11 (28.2%)          | 0.03047                  | 10 (45.5%)          | 0.00092               | 0.02185             | 0.00295                        | 0.01308                 |                                       |                              |                                       |                            |                                 |
| Alloscardovia omnicoles                                          | 0.00153                 | 4 (10.3%)           | 0.02244                  | 4 (18.2%)           | 0.00094               | 0.01657             | 0.00916                        | 0.03618                 |                                       |                              |                                       |                            |                                 |
| Ureaplasma urealyticum                                           | 0                       | 0                   | 0.00013                  | 1 (4.5%)            | 0                     | 0.00013             | 0.00005                        | 0.00030                 |                                       |                              |                                       |                            |                                 |
| Ureaplasma parvum:urealyticum                                    | 0                       | 0                   | 0.00011                  | 2 (9.1%)            | 0                     | 0.00010             | 0.00017                        | 0.00098                 |                                       |                              |                                       |                            |                                 |
| <b>More Abundant when Acute Inflammation (AI) Present*</b>       | <b>AI Absent (n=39)</b> |                     | <b>AI Present (n=19)</b> |                     | <b>Absent</b>         | <b>Present</b>      | <b>P-value</b>                 | <b>FDR adj. P-value</b> |                                       |                              |                                       |                            |                                 |
| Corynebacterium minutissimum                                     | 0.00659                 | 19 (48.7%)          | 0.05092                  | 12 (63.2%)          | 0.00214               | 0.02348             | 0.00018                        | 0.00079                 |                                       |                              |                                       |                            |                                 |
| Corynebacterium urealyticum                                      | 5.13E-06                | 1 (2.6%)            | 0.02782                  | 3 (15.8%)           | 5.13E-06              | 0.01944             | 0                              | 0                       |                                       |                              |                                       |                            |                                 |
| Actinobaculum schaalii                                           | 0.00145                 | 5 (12.8%)           | 0.02073                  | 1 (5.3%)            | 0.00079               | 0.02073             | 0.00646                        | 0.02146                 |                                       |                              |                                       |                            |                                 |
|                                                                  | <b>Mean</b>             | <b>No. Pos. (%)</b> | <b>Mean</b>              | <b>No. Pos. (%)</b> | <b>Mean</b>           | <b>No. Pos. (%)</b> | <b>Standard Errors</b>         |                         | <b>Negative Binomial Test (DESeq)</b> |                              |                                       |                            |                                 |
| <b>More Abundant with Higher Degree of Chronic Inflammation*</b> | <b>Low CI (n=15)</b>    |                     | <b>Medium CI (n=20)</b>  |                     | <b>High CI (n=23)</b> |                     | <b>Low</b>                     | <b>Medium</b>           | <b>High</b>                           | <b>Low vs Medium P-value</b> | <b>Low vs Medium FDR adj. P-value</b> | <b>Low vs High P-value</b> | <b>Low vs High adj. P-value</b> |
| Corynebacterium minutissimum                                     | 0.00747                 | 9 (60.0%)           | 0.00154                  | 7 (35.0%)           | 0.04703               | 15 (65.2%)          | 0.00367                        | 0.00074                 | 0.01946                               | 0.03106                      | 0.08054                               | 0.01275                    | 0.03924                         |
| Unassigned Enterobacteriaceae                                    | 0.00061                 | 2 (13.3%)           | 0.04043                  | 5 (25.0%)           | 0.02557               | 5 (21.7%)           | 0.00060                        | 0.03150                 | 0.01838                               | 0.02406                      | 0.06278                               | 0.03893                    | 0.100328                        |
| Unassigned Gammaproteobacteria                                   | 0                       | 0                   | 0.00042                  | 3 (15.0%)           | 0.01771               | 8 (34.8%)           | 0                              | 0.00027                 | 0.01172                               | 1.16E-08                     | 6.66E-08                              | 0                          | 0                               |
| Anaerococcus lactolyticus                                        | 0.00200                 | 2 (13.3%)           | 4.00E-05                 | 1 (5.0%)            | 0.00804               | 5 (21.7%)           | 0.00167                        | 2.34E-05                | 0.00548                               | 1.58E-08                     | 8.99E-08                              | 0.29632                    | 0.46661                         |
| Gardnerella vaginalis                                            | 0                       | 0                   | 0.03159                  | 4 (20.0%)           | 4.00E-04              | 1 (4.3%)            | 0                              | 0.03082                 | 4.00E-04                              | 0                            | 0                                     | 1.35E-08                   | 8.48E-08                        |

\*Inflammation analyses were limited to the benign samples.

\*\*Number of patients the species/OTU was identified in (% frequency).
