# Supplementary material
Source: PubMed Central journal article supplement (PMC5937117)

Supplemental Figure S2

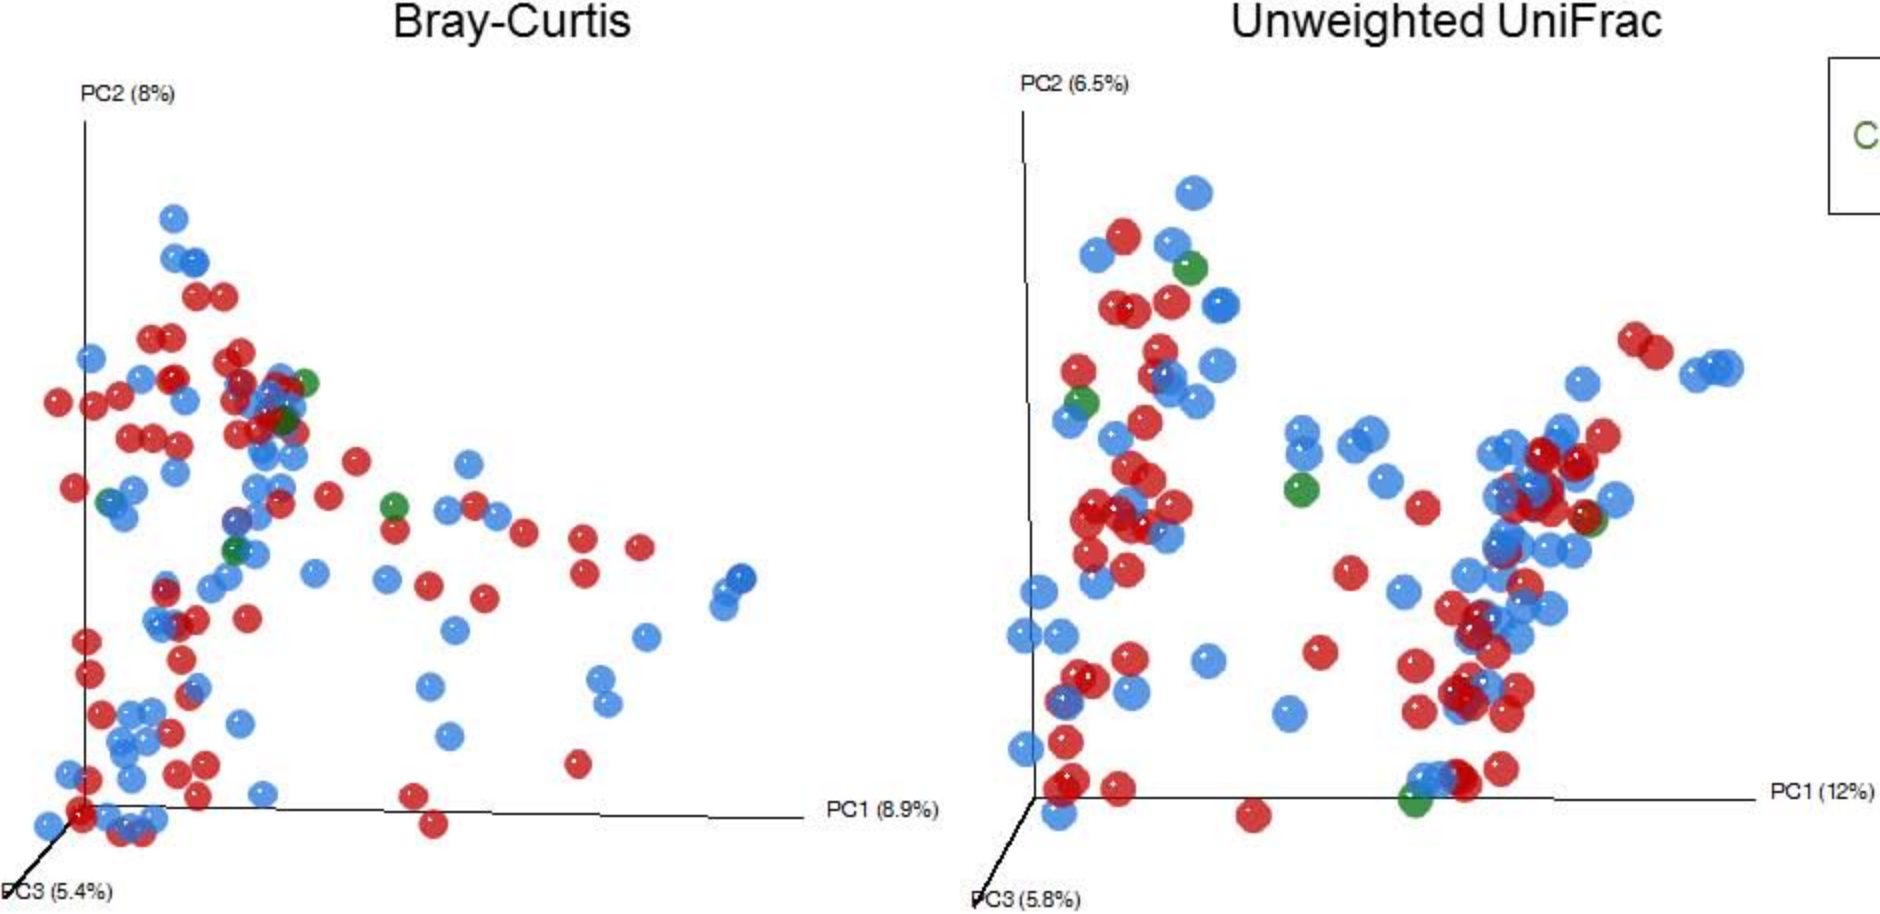

Supplement: NIHMS962908-supplement-Suppl_Fig_S2.pdf [file NIHMS962908-supplement-Suppl_Fig_S2.pdf]

Supplemental Figure S3, Acute Inflammation

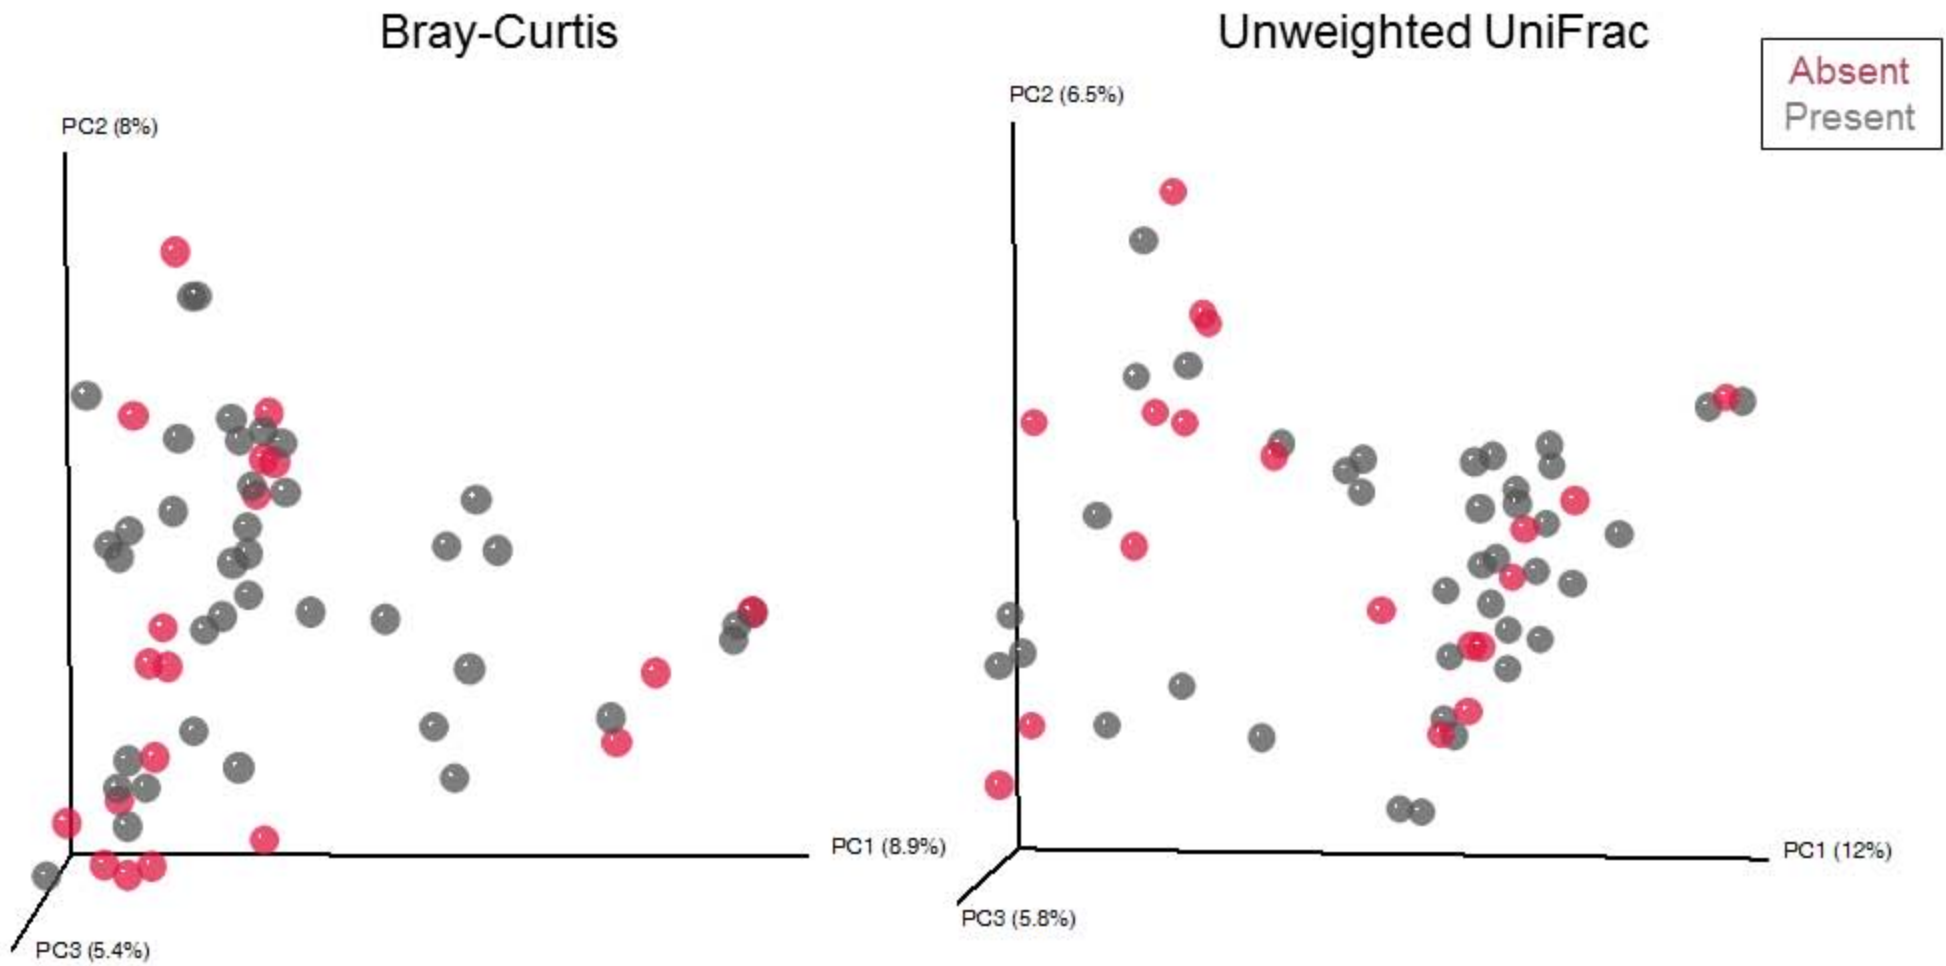

Supplement: NIHMS962908-supplement-Suppl_Fig_S3.pdf [file NIHMS962908-supplement-Suppl_Fig_S3.pdf]

Supplemental Figure S5, Gleason Score

Bray-Curtis

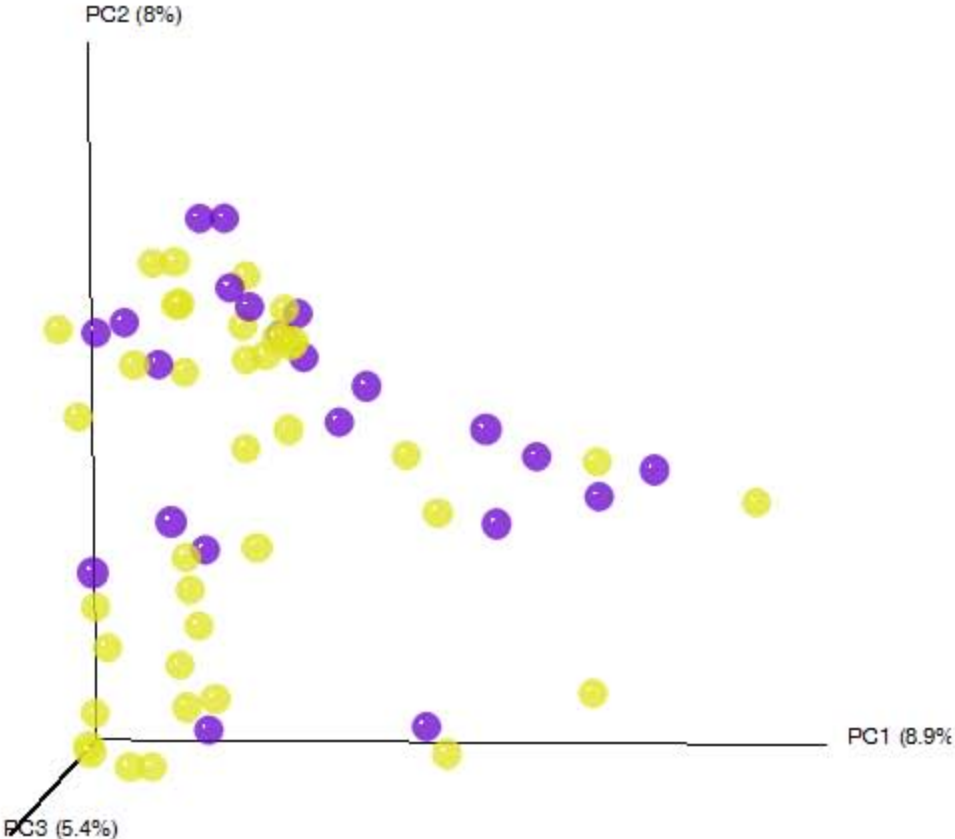

Unweighted UniFrac

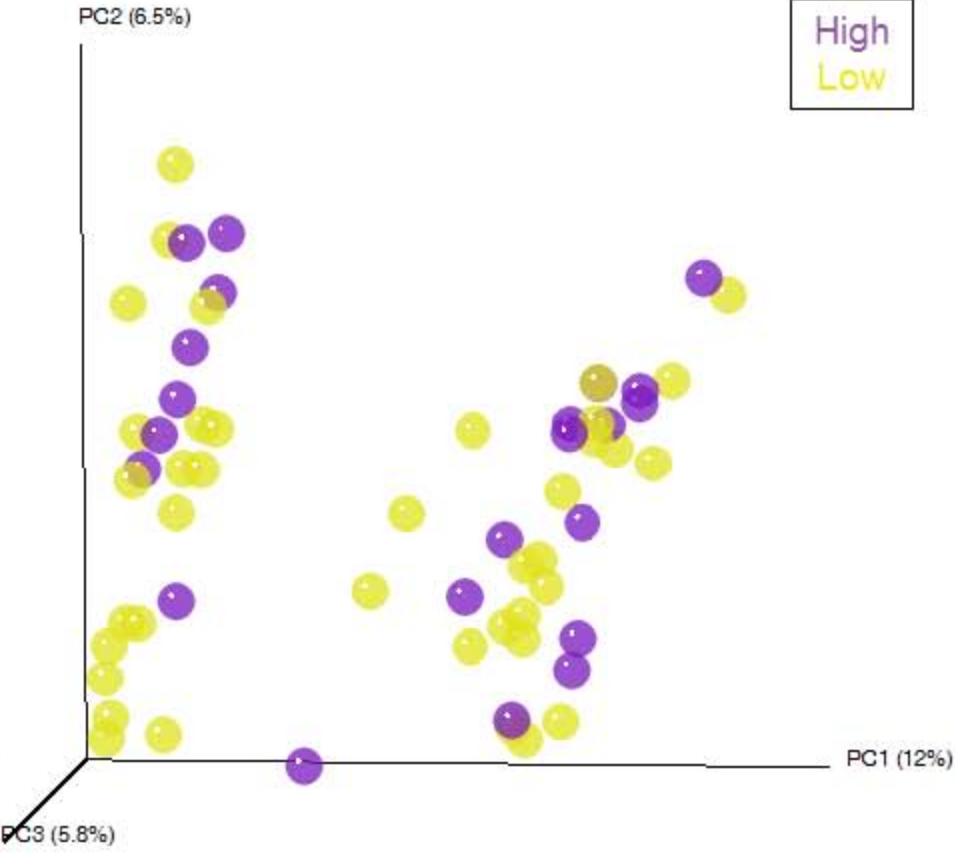

Supplement: NIHMS962908-supplement-Suppl_Fig_S5.pdf [file NIHMS962908-supplement-Suppl_Fig_S5.pdf]

Supplemental Figure S6, PSA (ng/ml)

Bray-Curtis

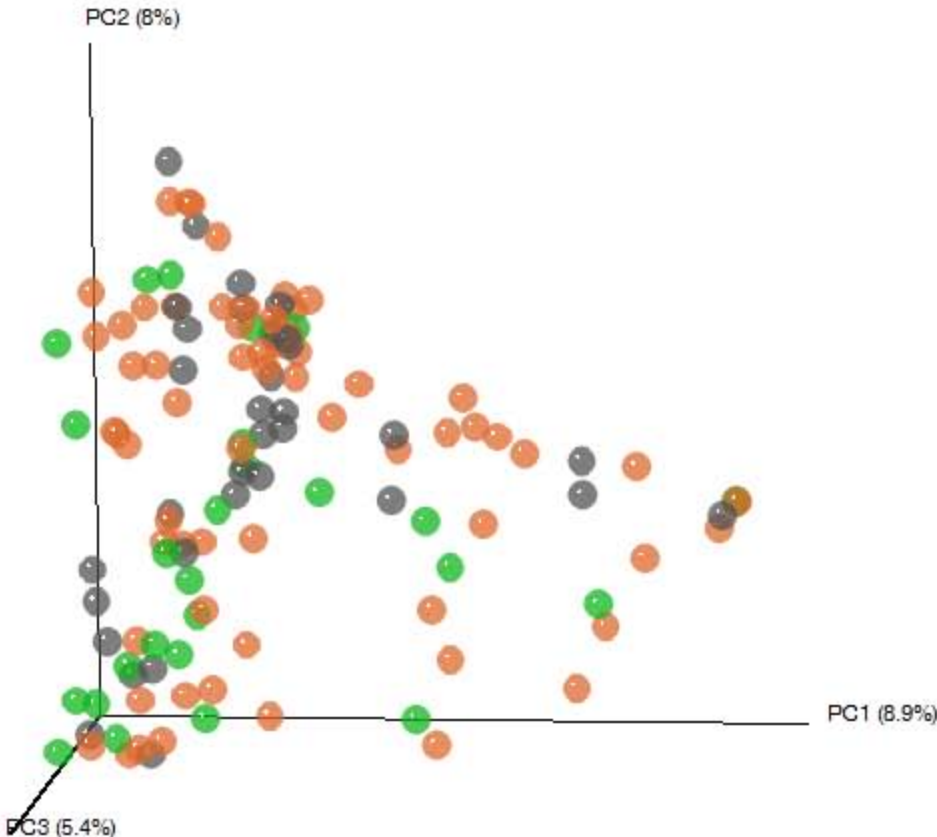

Unweighted UniFrac

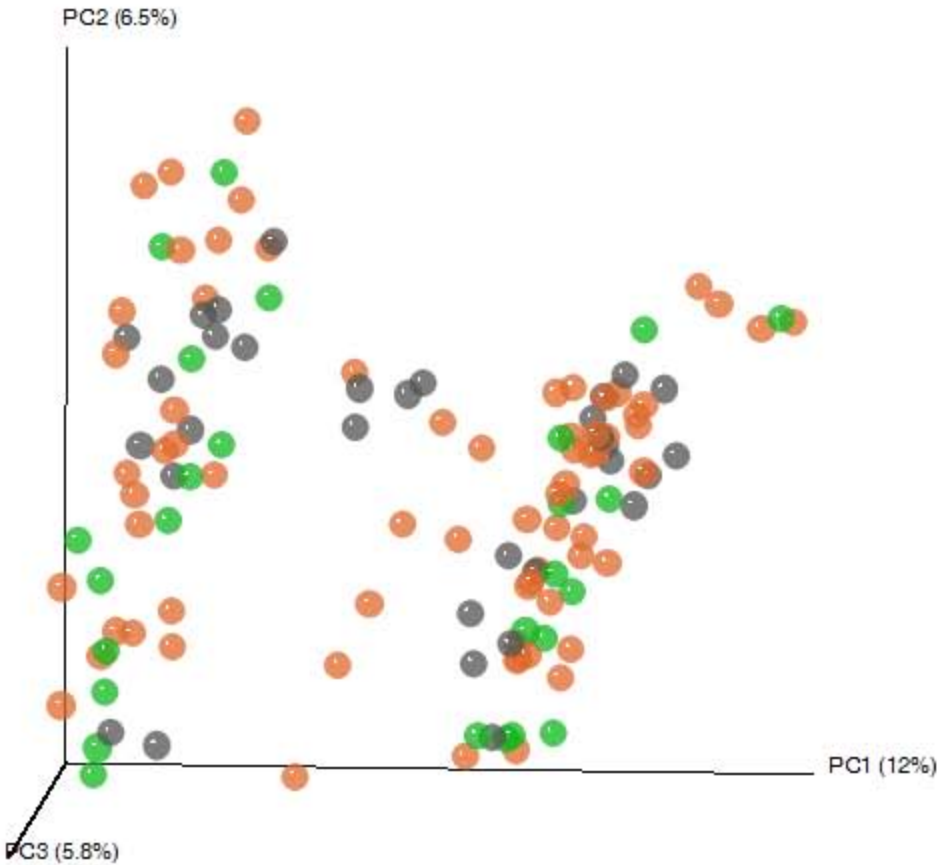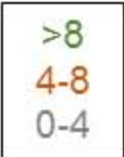

Supplement: NIHMS962908-supplement-Suppl_Fig_S6.pdf [file NIHMS962908-supplement-Suppl_Fig_S6.pdf]

Supplemental Figure S7, TRUS Volume (cc)

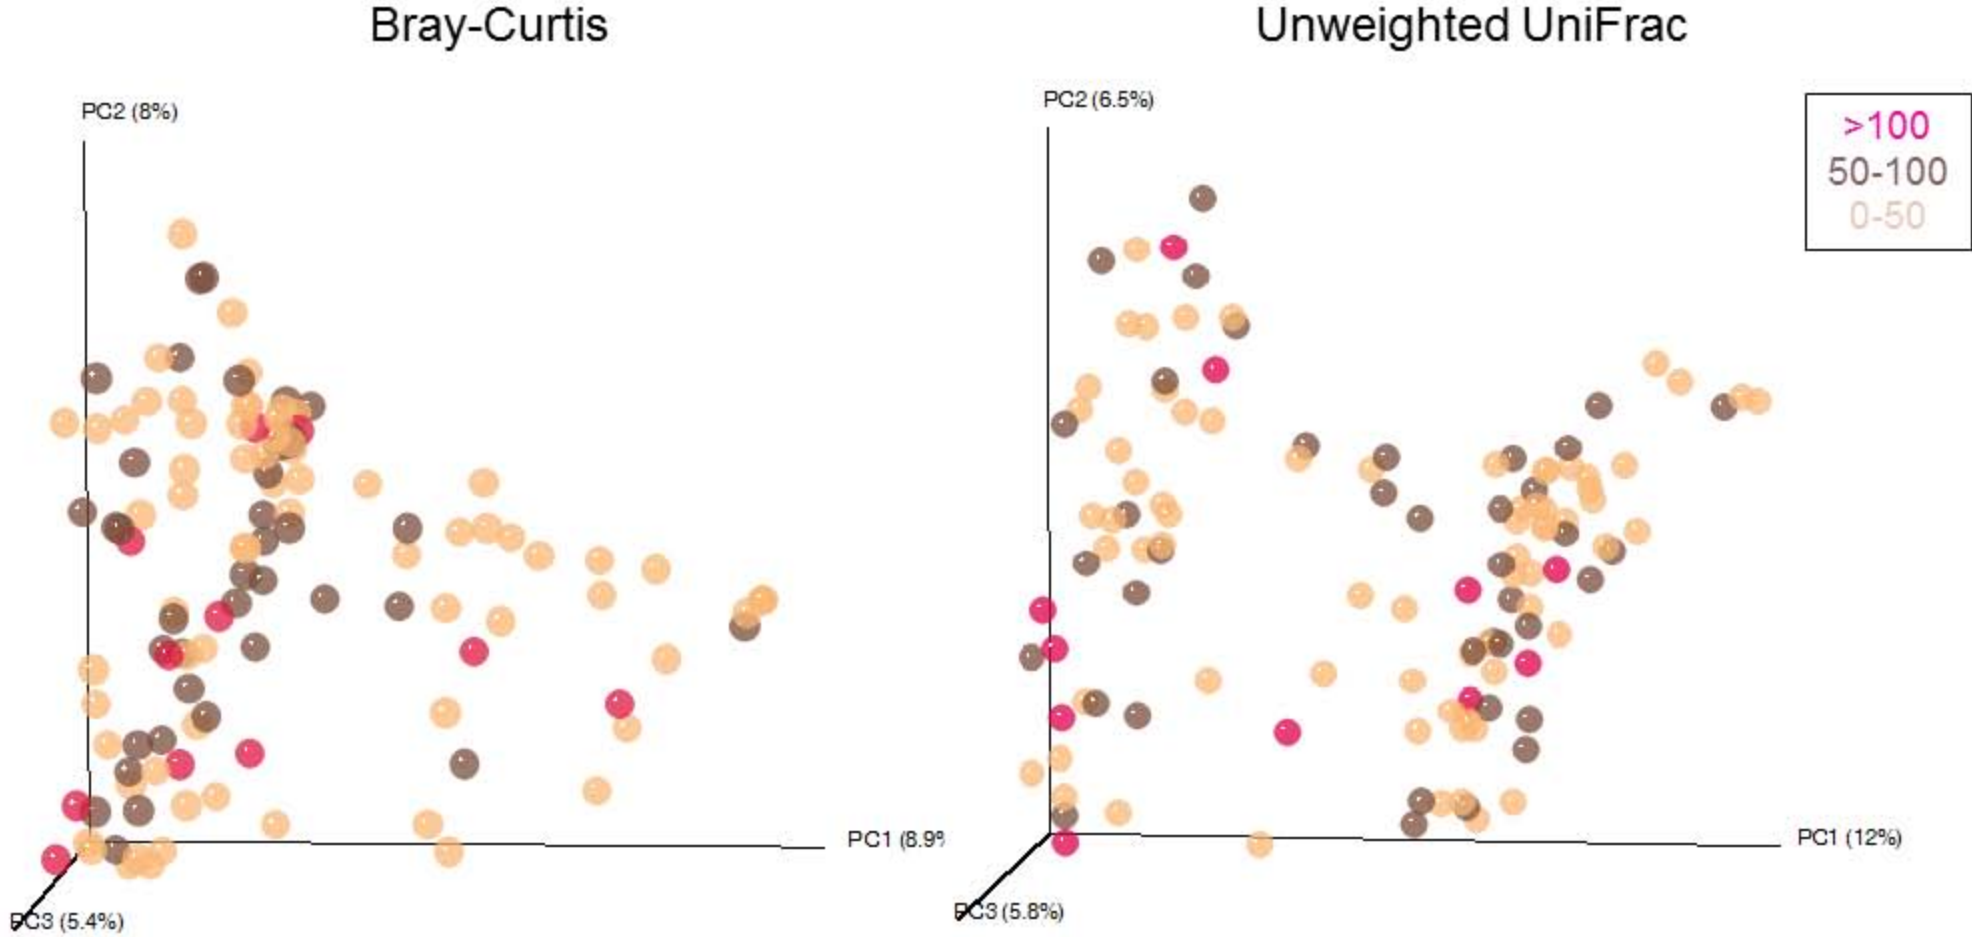

Supplement: NIHMS962908-supplement-Suppl_Fig_S7.pdf [file NIHMS962908-supplement-Suppl_Fig_S7.pdf]

Supplemental Figure S8

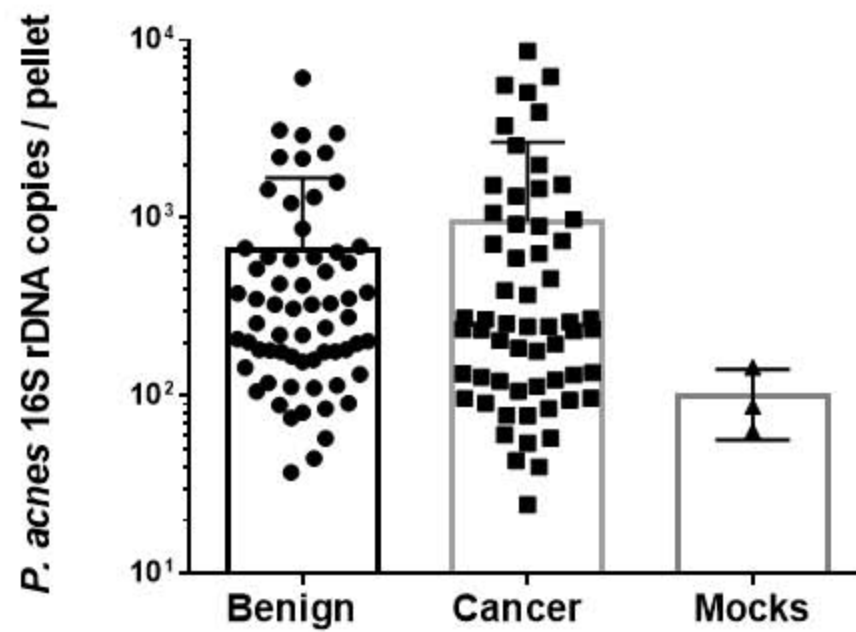

Supplement: NIHMS962908-supplement-Suppl_Fig_S8.pdf [file NIHMS962908-supplement-Suppl_Fig_S8.pdf]

Supplemental Figure S4, Chronic Inflammation

Bray-Curtis

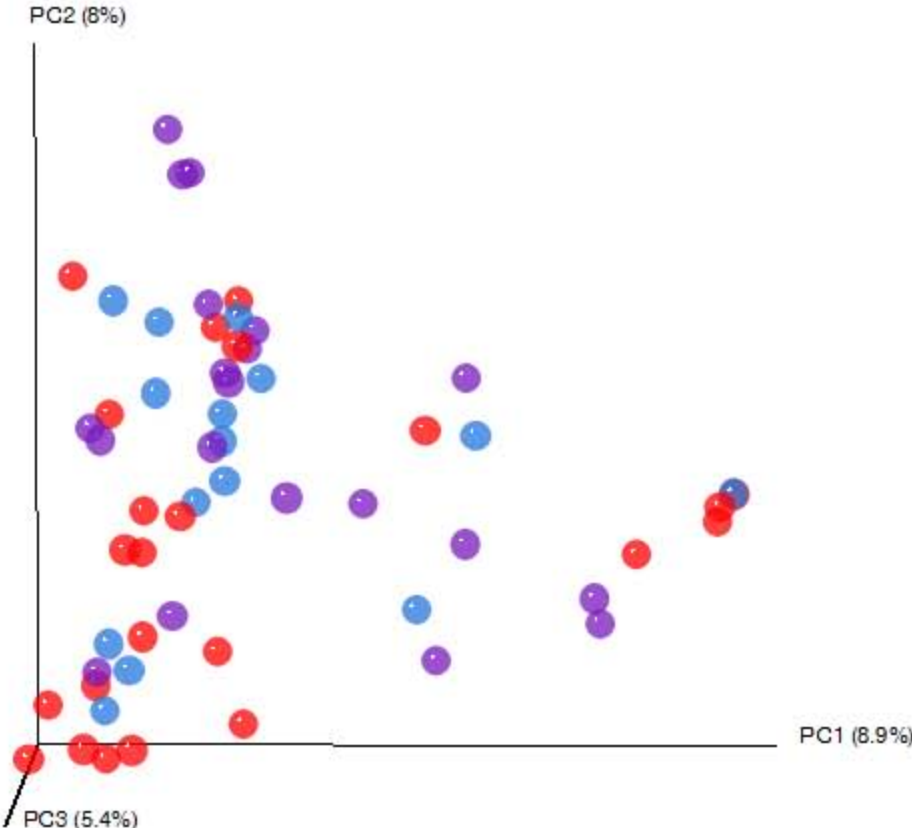

Unweighted UniFrac

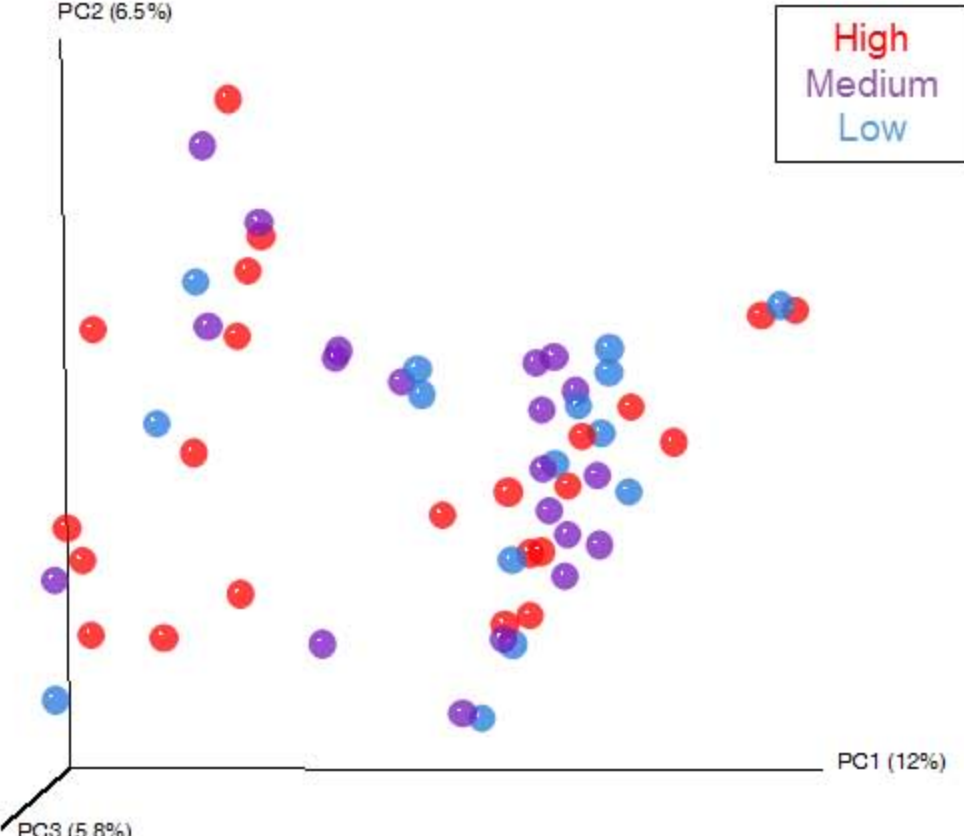

Supplement: NIHMS962908-supplement-suppl_Fig_S4.pdf [file NIHMS962908-supplement-suppl_Fig_S4.pdf]
